# Supplementary material for: Graphene oxide-stimulated acoustic attenuating performance of tungsten based epoxy films
Source: Royal Society of Chemistry journal article supplement (doi:10.1039/c5tc01347j), 2015-01-01
Supplement: c5tc01347j1.pdf [file c5tc01347j1.pdf]

## Supporting Information

### Graphene oxide-stimulated acoustic attenuating performance of Tungsten based Epoxy films

Yunfeng Qiu,<sup>a†</sup> JingJing Liu,<sup>a†</sup> Huihui Yang,<sup>a</sup> Feng Gao,<sup>a</sup> Yue Lu,<sup>a</sup> Rui Zhang,<sup>\*b</sup> Wenwu  
Cao,<sup>\*b,c</sup> PingAn Hu<sup>\*a</sup>

<sup>a</sup> Key Lab of Microsystem and Microstructure, Harbin Institute of Technology, Ministry of Education, No. 2 YiKuang Street, Harbin, 150080, P.R. China

<sup>b</sup> Condensed Matter Science and Technology Institute, Harbin Institute of Technology, Harbin 150080, China

<sup>c</sup> Department of Mathematics and Materials Research Institute, The Pennsylvania State University, University Park, Pennsylvania 16802, USA

† Qiu. Y. and Liu. J. contributed equally to this work.

**Table S1.** The mass loss of W, epoxy, GO and W/E/GO/E composite materials.

| Sample       | Mass ratio<br>(W:E:GO:E) | GO content<br>(wt %) | E content<br>(wt %) | Expected Mass<br>loss (wt %) | Mass loss<br>(wt %) |
|--------------|--------------------------|----------------------|---------------------|------------------------------|---------------------|
| E            | _____                    | 0                    | 100                 | _____                        | 80.87               |
| GO           | _____                    | 100                  | 0                   | _____                        | 71.86               |
| W/E/GO/E (a) | 60:1:3.5:0.1             | 5.42                 | 1.55                | 5.27                         | 2.97                |
| W/E/GO/E (b) | 60:3:3.5:0.1             | 5.26                 | 4.51                | 7.53                         | 5.85                |
| W/E/GO/E (c) | 60:5:3.5:0.1             | 5.11                 | 7.30                | 9.67                         | 9.31                |

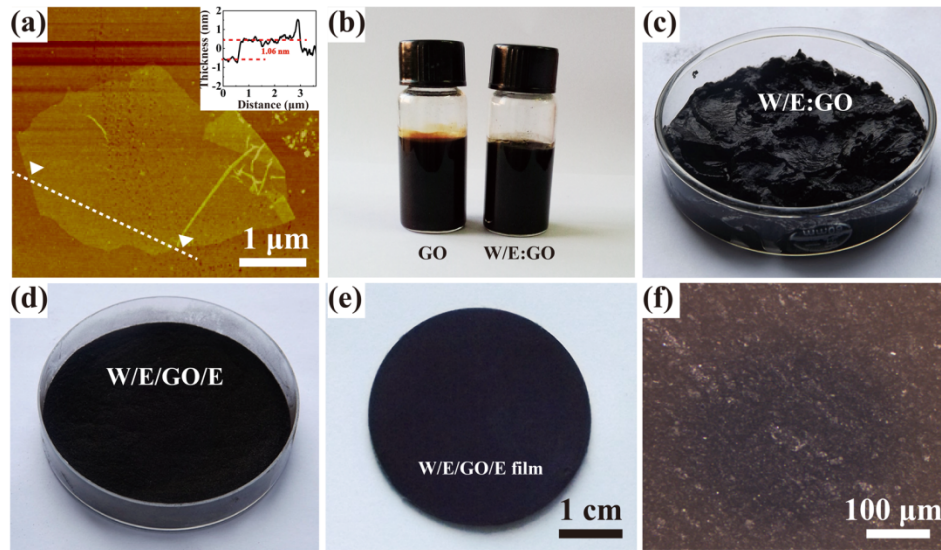

**Figure S1.** (a) AFM image of GO nanosheets on Si substrate. The inset of (a) is the height profile of the white dotted line. (b) The comparison of pure GO and W/E spheres loaded GO aqueous solutions. (c) The photograph of the wet W/E/GO composite precursor. (d) The dried powder of W/E/GO/E. (e) W/E/GO/E film with 2 mm thickness. (f) The optical image of the film's surface.

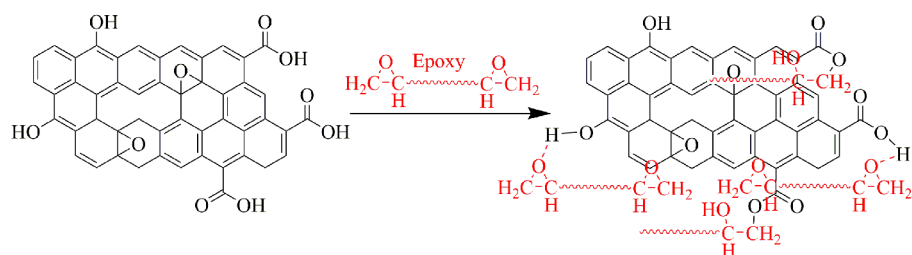

**Scheme S1.** Possible hydrogen bonds and chemical bonds between the epoxy resin and GO.

**Table S2.** Failure stress and strain, impedance, and attenuation of W, W/E and W/E/GO/E films.

| Films        | W/E<br>(Wt<br>%) | GO<br>(Wt<br>%) | Epo<br>xy<br>(Wt<br>%) | Failu<br>re<br>stress<br>(MP<br>a) | Stra<br>in<br>(%) | Impeda<br>nce<br>(MRayl<br>) | Attenuatio<br>n<br>(dB/cm*M<br>Hz) |
|--------------|------------------|-----------------|------------------------|------------------------------------|-------------------|------------------------------|------------------------------------|
| W            | 60/0             | 0               | 40                     | 54                                 | 2.8               | 5.4                          | 9.0                                |
| W/E          | 60/5             | 0               | 35                     | 87                                 | 1.8               | 5.6                          | 6.5                                |
| W/E/G<br>O/E | 60/5             | 3.5             | 31.5                   | 21                                 | 8.5               | 5.5                          | 36.5                               |

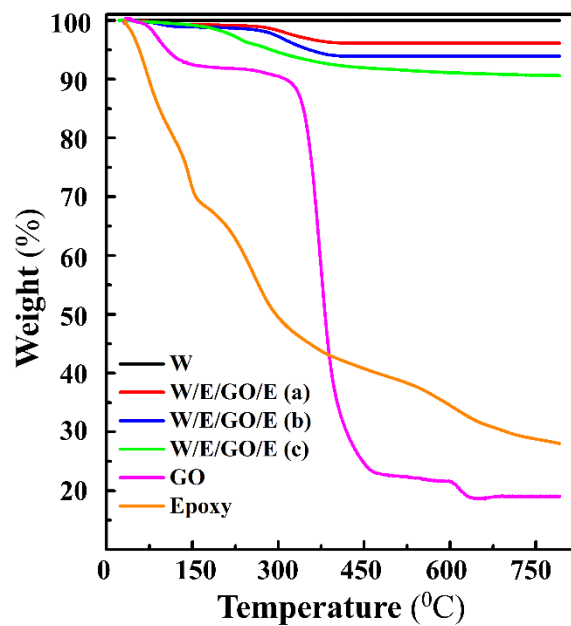

**Figure S2.** Thermogravimetric curves for W, epoxy, GO and W/E/GO/E composite materials. The mass ratio of W:E:GO:E in (a), (b) and (c) are 60:1:3.5:0.1, 60:3:3.5:0.1, and 60:5:3.5:0.1, respectively.

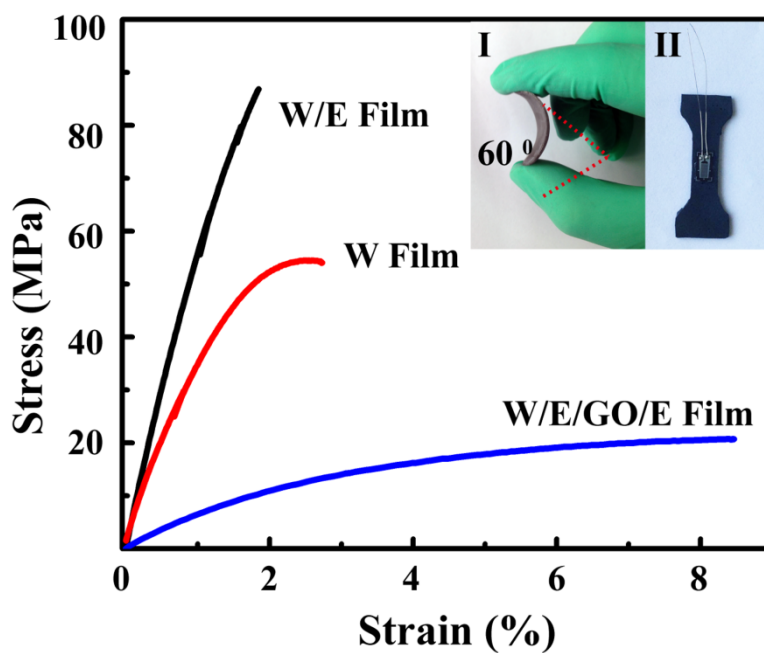

**Figure S3.** Stress-strain curves of W, W/E, W/E/GO/E films. The inset I shows the deformability of W/E/GO/E film. The inset II shows the dumbbell shape of specimen for stress-strain measurements.

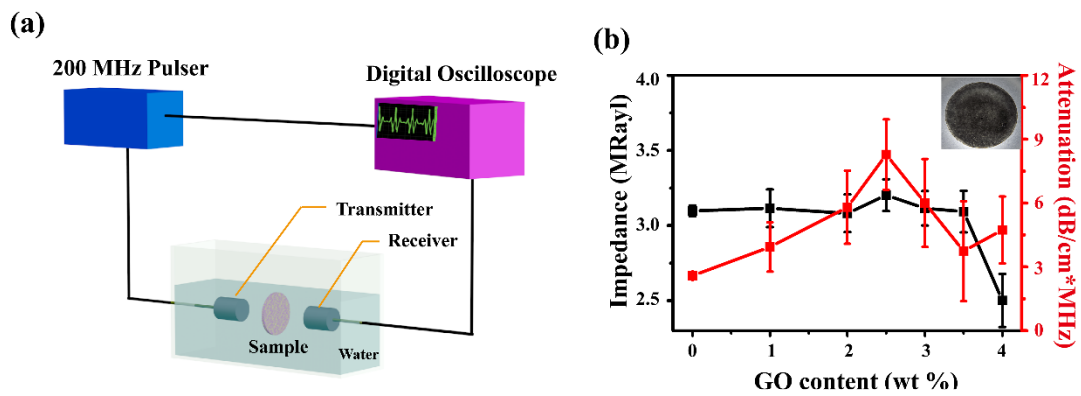

**Figure S4.** (a) The pulse-echo immersion technique used to measure the acoustic performance of our composite films. (b) The acoustic impedance and attenuation versus GO contents for GO/E films.
